# Supplementary material for: A village in a dish model system for population-scale hiPSC studies
Source: PubMed Central journal article supplement (PMC10256711; doi:10.1038/s41467-023-38704-1), 2023-06-09
Supplement: 41467_2023_38704_MOESM2_ESM.pdf [file 41467_2023_38704_MOESM2_ESM.pdf]

## Description of Additional Supplementary Files

### **Supplementary Data 1**

Variance of gene expression explained by each of the covariates for uni-culture and village samples collected across multiple sites.

### **Supplementary Data 2**

Variance of gene expression explained by each of the covariates for uni-culture and village samples collected at Site 3 before and after cryopreservation.

### **Supplementary Data 3**

hiPSC lines metrics.

### **Supplementary Data 4**

Variance of gene expression explained by each of the covariates for fresh and cryopreserved samples across pseudotime.

### **Supplementary Data 5**

Variance of gene expression explained by each of the covariates for villages collected during hiPSC village maintenance at passages one, four and eight.

### **Supplementary Data 6**

Proportion of lines during cardiomyocyte differentiation.

### **Supplementary Data 7**

Proportion of lines during multiple passages.

### **Supplementary Data 8**

scCODA Metrics.
